# Supplementary material for: A novel Pd3O9@α-Al2O3catalyst under a hydroxylated effect: high activity in the CO oxidation reaction
Source: Royal Society of Chemistry journal article supplement (doi:10.1039/c5cp03740a), 2015-01-01
Supplement: c5cp03740a1.pdf [file c5cp03740a1.pdf]

## Supplementary Material

### **A novel Pd<sub>3</sub>O<sub>9</sub>@ $\alpha$ -Al<sub>2</sub>O<sub>3</sub> catalyst under hydroxylated effect: high activity in CO oxidation reaction**

**Qiaohong Li, Yongqin Wei, Rongjian Sa, Zuju Ma and Kechen Wu\***

*State Key Laboratory of Structural Chemistry, Fujian Institute of Research on the  
Structure of Matter, Chinese Academy of Sciences, Fuzhou 350002, PR China*

---

\* Corresponding author. Fax: +86 591 83792932.  
E-mail address: wkc@fjirsm.ac.cn (K. Wu).

For further investigation of the  $\text{hy-3Pd}@-\alpha\text{-Al}_2\text{O}_3$  model, the total electron density and the charge density difference are dominated in Fig 1S. The results show hydroxylation has little influence on  $\text{Pd}_3\text{O}_9$  clusters. What's more, Pd, Al and H atoms lose electrons and O atoms get electrons. O-H bond is greatly covalent, while Pd-O and Al-O band is basically electrovalent.

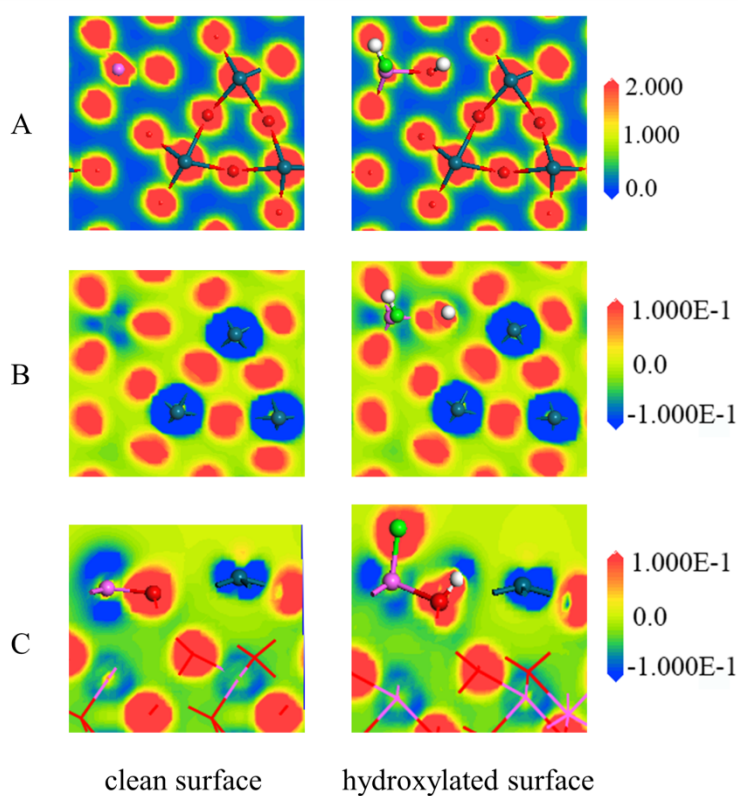

Fig. 1S. The total electron density (A, top view) and the charge density difference (B, top view and C, side view) of  $\text{hy-Pd}_3\text{O}_9@-\alpha\text{-Al}_2\text{O}_3$  model.

The total density of states (DOS) of a clean  $\alpha$ -Al<sub>2</sub>O<sub>3</sub>(0001) surface, Pd-doped clean and hydroxylated Pd-doped  $\alpha$ -Al<sub>2</sub>O<sub>3</sub>(0001) surface are shown in Fig. 2S, which depicts a clear splitting at the Fermi energy and some states shifting down in energy above the Fermi energy.

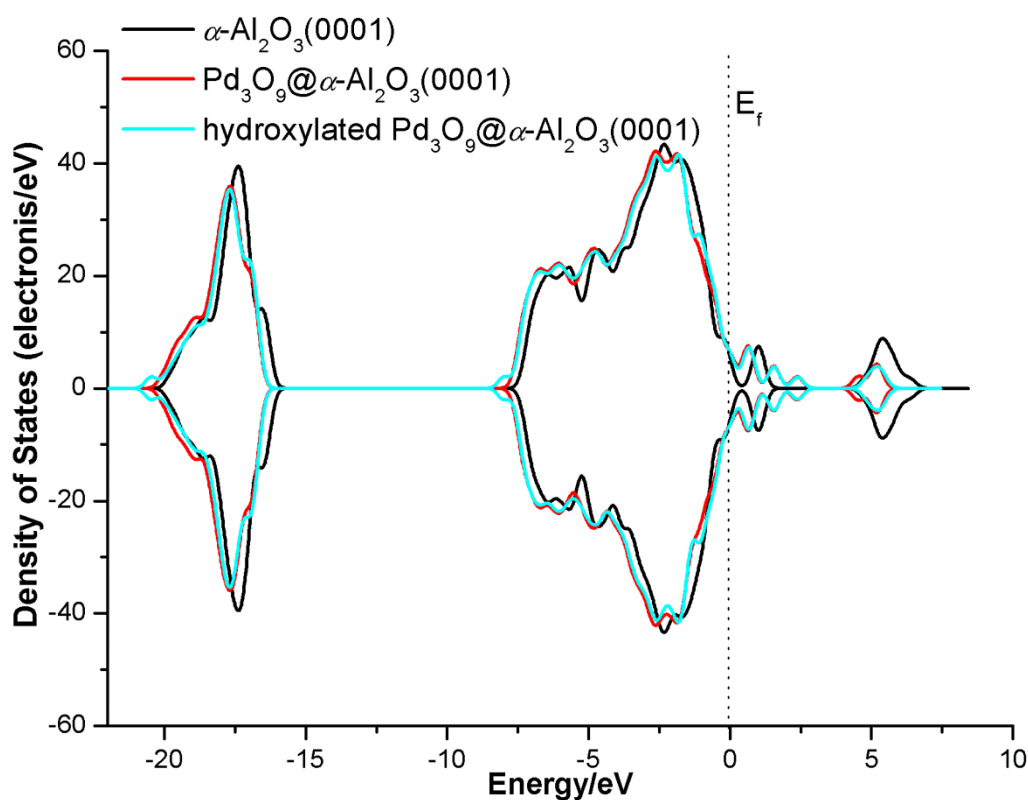

Fig. 2S. A: spin-polarized total density of states (DOS) of the undoped Pd@ $\alpha$ -Al<sub>2</sub>O<sub>3</sub>(0001) and hydroxylated Pd@ $\alpha$ -Al<sub>2</sub>O<sub>3</sub>(0001) surface.
